# Supplementary material for: Genetic Diversity Analysis of Salvadora Oleoides Decne: An Evergreen Dry Land Fruit Tree of Rajasthan, India
Source: Research Square preprint supplement (doi:10.21203/rs.3.rs-198120/v1), 2021-02-09
Supplement: Supplementary file 1 [file 7d3eb848e1f7dedb0771a543.docx]

**Table 1:** Collection sitesand sample codes of *Salvadora oleoides* from semi-arid and sub-humid climatic conditions of Rajasthan, India.

**S. No. Sample code Collection site**

**Latitude (N) & Longitude (E)**

1 PLSo-01 Pali

2 PLSo-02 25° 46' N and 73° 19' E

3 PLSo-03

4 PLSo-04

5 PLSo-05

6 JLSo-01 Jalore

7 JLSo-02 25° 20' N and 72° 37' E

8 JLSo-03

9 JLSo-04

10 JLSo-05

11 LOSo-01 Lohawat

12 LOSo-02 26° 58' N and 72° 34' E

13 LOSo-03

14 LOSo-04

15 LOSo-05

16 JPSo-01 Jodhpur

17 JPSo-02 26° 14' N and 73° 1' E

18 JPSo-03

19 JPSo-04

20 JPSo-05

21 PDSo-01 Pachpadra

22 PDSo-02 25° 55' N and 72° 15' E

23 PDSo-03

24 PDSo-04

25 PDSo-05

**Table 2:** Primer sequences and DNA polymorphism of *Salvadora oleoides* populations from semi-arid and sub-humid environments of Rajasthan, India.

**Primer Primer sequence 5' - 3' (nt) TB PB %P PIC**

**RAPD (10)**

OPC 02 GTGAGGCGTC (10) 10 10 100.0 0.28

OPC 04 CCGCATCTAC (10) 12 10 83.3 0.17

OPC 06 GAACGGACTC (10) 11 06 54.5 0.16

OPH 03 AGACGTCCAC (10) 13 13 100.0 0.33

OPH 05 AGTCGTCCCC (10) 06 06 100.0 0.25

OPH 08 GAAACACCCC (10) 09 09 100.0 0.21

OPH 13 GACGCCACAC (10) 11 04 36.4 0.12

OPH 15 AATGGCGCAG (10) 11 11 100.0 0.31

OPH 19 CTGACCAGCC (10) 12 11 91.7 0.30

OPX 11 GGAGCCTCAG (10) 14 12 85.7 0.20

**Total 109 92 84.4 0.23**

**ISSR (10)**

807 AGAGAGAGAGAGAGAGT (17) 10 08 80.0 0.17

811 GAGAGAGAGAGAGAGAC (17) 10 09 90.0 0.29

827 ACACACACACACACACG (17) 10 10 100.0 0.29

834 AGAGAGAGAGAGAGAGTT (18) 12 12 100.0 0.27

840 GAGAGAGAGAGAGAGATT (18) 15 12 80.0 0.27

862 AGCAGCAGCAGCAGCAGC (18) 16 16 100.0 0.30

873 GACAGACAGACAGACA (16) 05 04 80.0 0.18

892 TAGATCTGATATCTGAATTCCC (22) 08 05 62.5 0.14

895 AGAGTTGGTAGCTCTTGATC (20) 11 07 63.6 0.20

900 ACTTCCCCACAGGTTAACACA (21) 05 04 80.0 0.19

**Total** **102 87 85.3 0.23**

**ISJ (7)**

H 01 ACGCGTCAGGTAAGTACA (18) 10 09 90.0 0.20

H 02 ACGCGTCAGGTAAGTACC (18) 10 10 100.0 0.28

H 04 ACGCGTCAGGTAAGTACT (18) 09 07 77.8 0.10

H 05 ACGCGTCAGGTAAGTAGA (18) 15 15 100.0 0.28

H 06 ACGCGTCAGGTAAGTAGC (18) 11 07 63.6 0.19

H 07 ACGCGTCAGGTAAGTAGG (18) 11 08 72.7 0.21

H 10 GAAGCTTTCACCTGCAACC (19) 12 11 91.7 0.26

**Total**  **78 67 85.9 0.22**

**SPAR 289 246 85.1 0.23**

TB - Total bands; PB - Polymorphic bands; % P - % Polymorphism; PIC – Polymorphic information content
